# Supplementary material for: Metabolic Effects of High Glycaemic Index Diets: A Systematic Review and Meta-Analysis of Feeding Studies in Mice and Rats
Source: PubMed Central journal article supplement (PMC5537766; doi:10.3390/nu9070646), 2017-06-22
Supplement: nutrients-09-00646-s001.pdf [file nutrients-09-00646-s001.pdf]

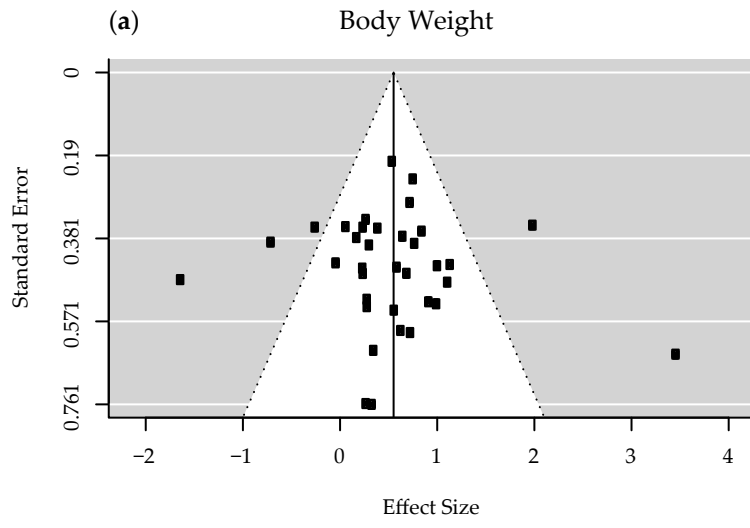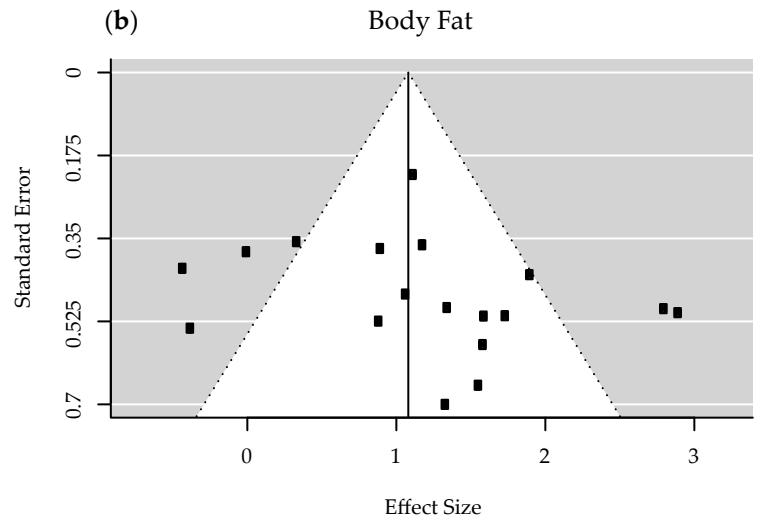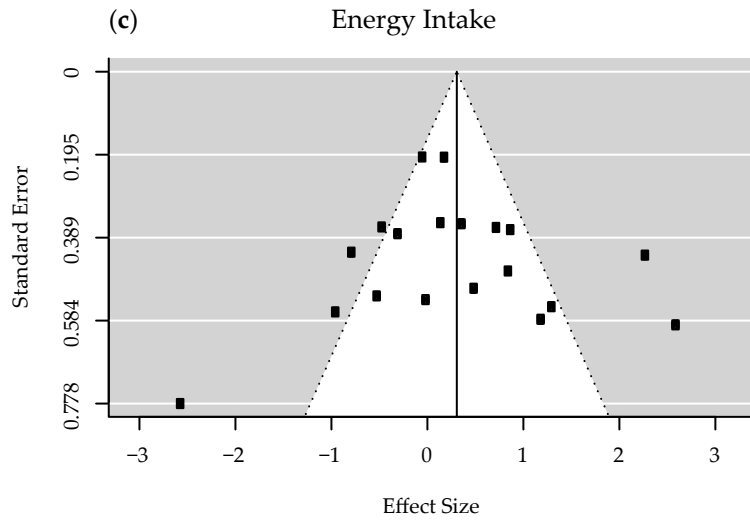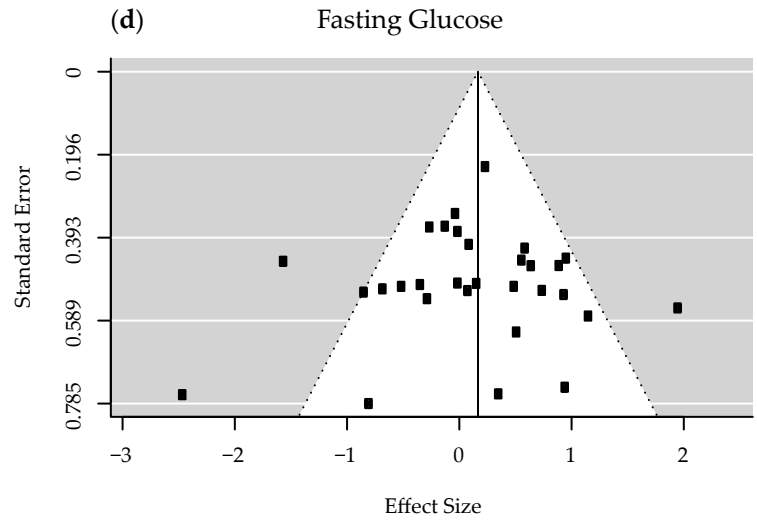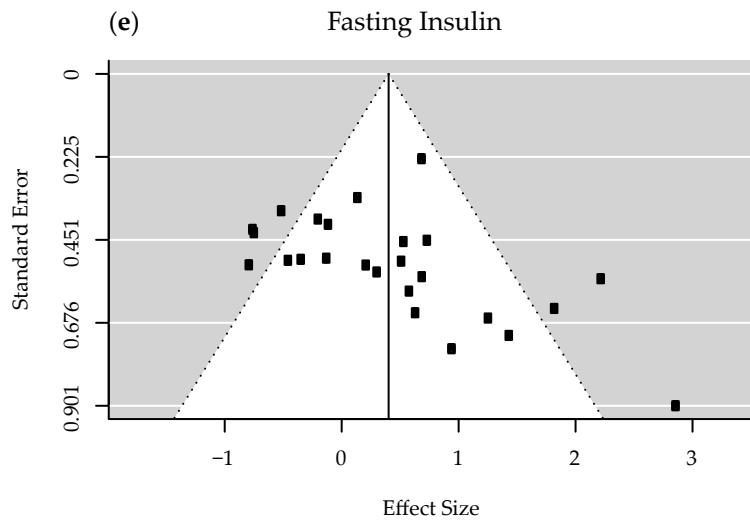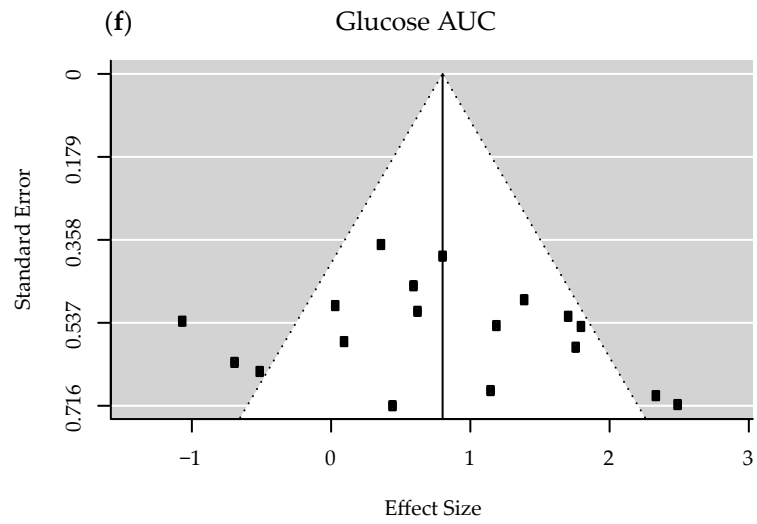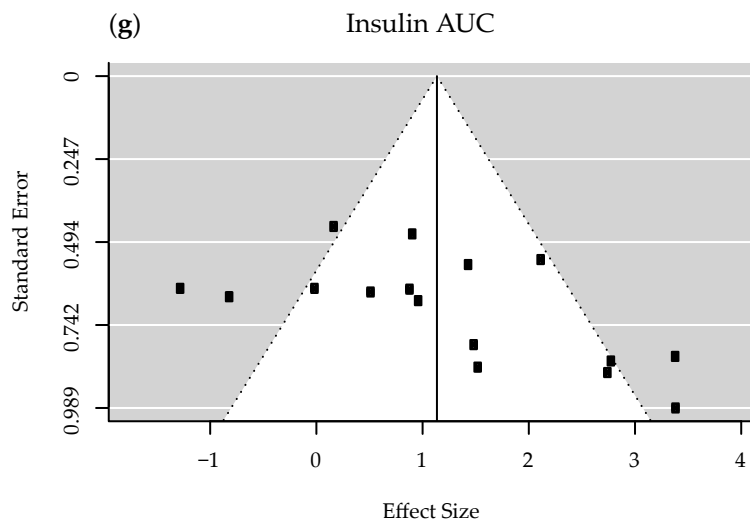

Figure S1: Funnel plot of effect sizes.

Table S1: Raw data for meta-analysis.

| Data ID | Article | Species  | Sex | Start Age (day) | Test n | Test Meas | Test SEM | Ctrl n | Ctrl Meas | Ctrl SEM | Units      | Trait    | Method       | TimePt (days) | Fast time (hrs) | Anaes G/I (Y/N) | Fat (% E) | Test ID | Ctrl ID | Note/Flag                                                                                                          |
|---------|---------|----------|-----|-----------------|--------|-----------|----------|--------|-----------|----------|------------|----------|--------------|---------------|-----------------|-----------------|-----------|---------|---------|--------------------------------------------------------------------------------------------------------------------|
| 3       | R14     | Wistar   | F   |                 | 14     | 315.888   | 1.869    | 14     | 327.103   | 5.607    | g          | BW       | Gravimetric  | 63            |                 | No              | 16        | t.02    | c.02    | Average wks 8-10. Using midpoint of 63 days                                                                        |
| 5       | R14     | Wistar   | F   |                 | 14     | 5.9       | 0.3      | 14     | 5.9       | 0.2      | mmol/L     | Fast Glu | Basal IPGTT  | 70            | 15              | No              | 16        | t.02    | c.02    | overnight fast; no anaesthesia mentioned for IPGTT                                                                 |
| 4       | R14     | Wistar   | F   |                 | 14     | 1523      | 72       | 14     | 1322      | 55       | mM.min     | Glu AUC  | IPGTT        | 70            | 15              | No              | 16        | t.02    | c.02    | End of lactation; overnight fast; no anaesthesia mentioned for IPGTT                                               |
| 6       | R14     | Wistar   | F   |                 | 14     | 5.68      | 0.64     | 14     | 5.67      | 0.89     | % BW       | BF       | necropsy     | 70            |                 | No              | 16        | t.02    | c.02    |                                                                                                                    |
| 170     | R14     | Wistar   | F   |                 | 14     | 873.3214  | 47.85354 | 14     | 927.1554  | 47.85354 | kJ/kg/day  | E intake | by food int. | 70            |                 | No              | 16        | t.02    | c.02    | During lactation; Weeks 8-10                                                                                       |
| 18      | M09     | C57BL/6J | F   | 49              | 7      | 17.9      | 0.8      | 7      | 19.3      | 1.7      | %          | BF       | DEXA         | 154           |                 | No              | 13.5      | t.07    | c.07    | Low fat diet only; Predicted GIs 53 and 102. Start age 6-8 wk. Used average of 49 days.                            |
| 19      | M09     | C57BL/6J | F   | 49              | 7      | 7.7       | 0.7      | 7      | 5.7       | 0.5      | mM         | Fast Glu | NS           | 154           | 12              | Yes             | 13.5      | t.07    | c.07    |                                                                                                                    |
| 20      | M09     | C57BL/6J | F   | 49              | 7      | 136       | 21       | 7      | 104       | 9        | pM         | Fast Ins | NS           | 154           | 12              | Yes             | 13.5      | t.07    | c.07    |                                                                                                                    |
| 21      | M09     | C57BL/6J | F   | 49              | 7      | 26.9203   | 0.57975  | 7      | 26.34055  | 0.7971   | g          | BW       | Gravimetric  | 154           |                 | No              | 13.5      | t.07    | c.07    |                                                                                                                    |
| 171     | M09     | C57BL/6J | F   | 49              | 7      | 46.2      | 1.1      | 7      | 42.3      | 1.2      | kJ/day     | E intake | by food int. | 154           |                 | No              | 13.5      | t.07    | c.07    | Mean weeks 0-22                                                                                                    |
| 22      | R10     | SD       | M   | 126             | 11     | 46.4      | 1.98     | 10     | 33.2      | 2.53     | g          | BF       | necropsy     | 28            |                 | No              | 16.7      | t.08    | c.08    | AL; Ad lib (AL) and energy rest (ER); 4 wks HF to establish DIO rats; Assume Adult = 18wks                         |
| 23      | R10     | SD       | M   | 126             | 12     | 23.2      | 1.72     | 12     | 26.7      | 2.76     | g          | BF       | necropsy     | 28            |                 | No              | 16.7      | t.09    | c.09    | ER                                                                                                                 |
| 24      | R10     | SD       | M   | 126             | 11     | 6.8       | 0.19     | 10     | 6.1       | 0.27     | mmol/L     | Fast Glu | necropsy     | 28            | 12              | No              | 16.7      | t.08    | c.08    | AL                                                                                                                 |
| 25      | R10     | SD       | M   | 126             | 12     | 6.9       | 0.2      | 12     | 6.8       | 0.34     | mmol/L     | Fast Glu | necropsy     | 28            | 12              | No              | 16.7      | t.09    | c.09    | ER                                                                                                                 |
| 26      | R10     | SD       | M   | 126             | 11     | 417       | 27.3     | 10     | 246.3     | 15.1     | pmol/L     | Fast Ins | necropsy     | 28            | 12              | No              | 16.7      | t.08    | c.08    | AL                                                                                                                 |
| 27      | R10     | SD       | M   | 126             | 12     | 270.1     | 22.6     | 12     | 278.7     | 24.8     | pmol/L     | Fast Ins | necropsy     | 28            | 12              | No              | 16.7      | t.09    | c.09    | ER                                                                                                                 |
| 28      | R10     | SD       | M   | 126             | 11     | 591.784   | 10.798   | 10     | 568.31    | 12.4415  | g          | BW       | Gravimetric  | 28            |                 | No              | 16.7      | t.08    | c.08    | AL                                                                                                                 |
| 29      | R10     | SD       | M   | 126             | 12     | 583.803   | 7.042    | 12     | 503.052   | 5.8685   | g          | BW       | Gravimetric  | 28            |                 | No              | 16.7      | t.09    | c.09    | ER                                                                                                                 |
| 30      | R10     | SD       | M   | 126             | 5      | 1453      | 63.4     | 5      | 1294      | 46.1     | mM/min     | Glu AUC  | OGTT         | 28            | 12              | No              | 16.7      | t.08    | c.08    | AL; sample size 5-8; no anaesthesia mentioned for OGTT                                                             |
| 31      | R10     | SD       | M   | 126             | 5      | 1202      | 18.3     | 5      | 1245      | 45.7     | mM/min     | Glu AUC  | OGTT         | 28            | 12              | No              | 16.7      | t.09    | c.09    | ER; sample size 5-8                                                                                                |
| 32      | R10     | SD       | M   | 126             | 5      | 4.7       | 0.04     | 5      | 4.5       | 0.11     | Log pM/min | Ins AUC  | OGTT         | 28            | 12              | No              | 16.7      | t.08    | c.08    | AL; sample size 5-8                                                                                                |
| 33      | R10     | SD       | M   | 126             | 5      | 4.6       | 0.03     | 5      | 4.6       | 0.03     | Log pM/min | Ins AUC  | OGTT         | 28            | 12              | No              | 16.7      | t.09    | c.09    | ER; sample size 5-8                                                                                                |
| 172     | R10     | SD       | M   | 126             | 11     | 11        | 0.17     | 10     | 9.2       | 0.24     | MJ/4 wk    | E intake | by food int. | 28            |                 | No              | 16.7      | t.08    | c.08    | AL                                                                                                                 |
| 173     | R10     | SD       | M   | 126             | 12     | 6.9       | 0.01     | 12     | 7         | 0.05     | MJ/4 wk    | E intake | by food int. | 28            |                 | No              | 16.7      | t.09    | c.09    | ER                                                                                                                 |
| 34      | R11     | SD       | M   | 63              | 16     | 485       | 15       | 16     | 461       | 14       | g          | BW       | DXA          | 28            |                 | No              | 16.7      | t.10    | c.10    | 0% vs 16%; Obesity Prone (OP) and res (OR); The n is always half each O phenotype; 5 diets: 0, 4, 8, 12 and 16% RS |
| 35      | R11     | SD       | M   | 63              | 16     | 465       | 12       | 16     | 461       | 14       | g          | BW       | DXA          | 28            |                 | No              | 16.7      | t.11    | c.10    | 4% vs 16%                                                                                                          |
| 36      | R11     | SD       | M   | 63              | 16     | 445       | 18       | 16     | 461       | 14       | g          | BW       | DXA          | 28            |                 | No              | 16.7      | t.12    | c.10    | 8% vs 16%                                                                                                          |
| 37      | R11     | SD       | M   | 63              | 16     | 474       | 11       | 16     | 461       | 14       | g          | BW       | DXA          | 28            |                 | No              | 16.7      | t.13    | c.10    | 12% vs 16%                                                                                                         |
| 38      | R11     | SD       | M   | 63              | 16     | 0.608696  | 0.478264 | 16     | -5.15217  | 0.52174  | %          | BF       | DXA          | 28            |                 | No              | 16.7      | t.10    | c.10    | 0% vs 16%                                                                                                          |
| 39      | R11     | SD       | M   | 63              | 16     | 0.804348  | 0.478262 | 16     | -5.15217  | 0.52174  | %          | BF       | DXA          | 28            |                 | No              | 16.7      | t.11    | c.10    | 4% vs 16%                                                                                                          |
| 40      | R11     | SD       | M   | 63              | 16     | -1.23913  | 0.47826  | 16     | -5.15217  | 0.52174  | %          | BF       | DXA          | 28            |                 | No              | 16.7      | t.12    | c.10    | 8% vs 16%                                                                                                          |
| 41      | R11     | SD       | M   | 63              | 16     | -3.26087  | 0.5      | 16     | -5.15217  | 0.52174  | %          | BF       | DXA          | 28            |                 | No              | 16.7      | t.13    | c.10    | 12% vs 16%                                                                                                         |
| 42      | R11     | SD       | M   | 63              | 8      | 6.4       | 0.2      | 8      | 6.3       | 0.2      | mmol/L     | Fast Glu | tail vein    | 21            | 12              | Yes             | 16.7      | t.10    | c.10    | 0% vs 16%                                                                                                          |
| 43      | R11     | SD       | M   | 63              | 8      | 5.9       | 0.2      | 8      | 6.3       | 0.2      | mmol/L     | Fast Glu | tail vein    | 21            | 12              | Yes             | 16.7      | t.11    | c.10    | 4% vs 16%                                                                                                          |
| 44      | R11     | SD       | M   | 63              | 8      | 6         | 0.2      | 8      | 6.3       | 0.2      | mmol/L     | Fast Glu | tail vein    | 21            | 12              | Yes             | 16.7      | t.12    | c.10    | 8% vs 16%                                                                                                          |
| 45      | R11     | SD       | M   | 63              | 8      | 6.3       | 0.2      | 8      | 6.3       | 0.2      | mmol/L     | Fast Glu | tail vein    | 21            | 12              | Yes             | 16.7      | t.13    | c.10    | 12% vs 16%                                                                                                         |
| 46      | R11     | SD       | M   | 63              | 8      | 241       | 52       | 8      | 293       | 52       | pmol/L     | Fast Ins | tail vein    | 21            | 12              | Yes             | 16.7      | t.10    | c.10    | 0% vs 16%                                                                                                          |
| 47      | R11     | SD       | M   | 63              | 8      | 275       | 52       | 8      | 293       | 52       | pmol/L     | Fast Ins | tail vein    | 21            | 12              | Yes             | 16.7      | t.11    | c.10    | 4% vs 16%                                                                                                          |
| 48      | R11     | SD       | M   | 63              | 8      | 172       | 52       | 8      | 293       | 52       | pmol/L     | Fast Ins | tail vein    | 21            | 12              | Yes             | 16.7      | t.12    | c.10    | 8% vs 16%                                                                                                          |
| 49      | R11     | SD       | M   | 63              | 8      | 224       | 52       | 8      | 293       | 52       | pmol/L     | Fast Ins | tail vein    | 21            | 12              | Yes             | 16.7      | t.13    | c.10    | 12% vs 16%                                                                                                         |
| 174     | R11     | SD       | M   | 63              | 16     | 378       | 12       | 16     | 338       | 10       | kJ/day     | E intake | by food int. | 14            |                 | No              | 16.7      | t.10    | c.10    | 0% vs 16%                                                                                                          |
| 175     | R11     | SD       | M   | 63              | 16     | 364       | 7        | 16     | 338       | 10       | kJ/day     | E intake | by food int. | 14            |                 | No              | 16.7      | t.11    | c.10    | 4% vs 16%                                                                                                          |
| 176     | R11     | SD       | M   | 63              | 16     | 355       | 12       | 16     | 338       | 10       | kJ/day     | E intake | by food int. | 14            |                 | No              | 16.7      | t.12    | c.10    | 8% vs 16%                                                                                                          |
| 177     | R11     | SD       | M   | 63              | 16     | 345       | 12       | 16     | 338       | 10       | kJ/day     | E intake | by food int. | 14            |                 | No              | 16.7      | t.13    | c.10    | 12% vs 16%                                                                                                         |
| 50      | R12     | Wistar   | M   | 49              | 6      | 268       | 11.7     | 6      | 246       | 10.7     | g          | BW       | Gravimetric  | 56            |                 | No              | 2.5       | t.14    | c.11    | Only high digestible starch (HDSD) and high resistant                                                              |

|     |     |          |   |     |    |          |          |    |          |          |               |          |                      |     |     |     |      |           |           |                                                                                                                     |               |
|-----|-----|----------|---|-----|----|----------|----------|----|----------|----------|---------------|----------|----------------------|-----|-----|-----|------|-----------|-----------|---------------------------------------------------------------------------------------------------------------------|---------------|
|     |     |          |   |     |    |          |          |    |          |          |               |          |                      |     |     |     |      |           |           |                                                                                                                     | starch (HRSD) |
| 51  | R12 | Wistar   | M | 49  | 6  | 98       | 4        | 6  | 121      | 3        | mg/dL         | Fast Glu | necropsy             | 56  | 12  | Yes | 2.5  | t.14      | c.11      |                                                                                                                     |               |
| 52  | R12 | Wistar   | M | 49  | 6  | 1.3      | 0.3      | 6  | 0.9      | 0.2      | ng/dL         | Fast Ins | necropsy             | 56  | 12  | Yes | 2.5  | t.14      | c.11      |                                                                                                                     |               |
| 53  | R12 | Wistar   | M | 49  | 6  | 13404.3  | 851      | 6  | 13191.5  | 638.3    | mg/dL.min     | Glu AUC  | OGTT                 | 54  | 12  | No  | 2.5  | t.14      | c.11      | no anaesthesia mentioned for OGTT                                                                                   |               |
| 178 | R12 | Wistar   | M | 49  | 6  | 628      | 8.7      | 6  | 845      | 44.4     | average Cal   | E intake | by food int.         | 56  |     | No  | 2.5  | t.14      | c.11      |                                                                                                                     |               |
| 54  | R01 | SD       | M | 56  | 6  | 432.178  | 6.9305   | 6  | 422.277  | 4.4555   | g             | BW       | Gravimetric          | 63  |     | No  | 11   | t.15      | c.12      | Every rat group had surgery to fit indwelling cannula 1 wk before their respective IVGTT                            |               |
| 55  | R01 | SD       | M | 56  | 4  | 863      | 215      | 3  | 237      | 75       | pM/120min     | Ins AUC  | IVGTT                | 63  | 15  | No  | 11   | t.15      | c.12      | Overnight fast stated; no anaesthesia mentioned for IVGTT                                                           |               |
| 56  | R01 | Wistar   | M | 24  | 24 | 333.5    | 6.75     | 24 | 312.5    | 4.5      | g             | BW       | Gravimetric          | 84  |     | No  | 11   | t.16      | c.13      | Start age 3-4 weeks; using midpoint 24 days                                                                         |               |
| 57  | R01 | Wistar   | M | 24  | 5  | 699      | 52       | 5  | 326      | 35       | nM/120 min    | Ins AUC  | IVGTT                | 84  | 15  | No  | 11   | t.16      | c.13      | Overnight fast stated; no anaesthesia mentioned for IVGTT                                                           |               |
| 58  | R01 | Wistar   | M | 24  | 5  | 1.7      | 0.3      | 5  | 0.9      | 0.1      | pmol/L        | Fast Ins | Basal IVGTT          | 84  | 15  | No  | 11   | t.16      | c.13      | Overnight fast stated; no anaesthesia mentioned for IVGTT                                                           |               |
| 60  | M10 | C57BL/6  | M | 49  | 8  | 33.0814  | 1.30815  | 7  | 31.8605  | 1.56975  | g             | BW       | Gravimetric          | 112 |     | No  | 15   | t.17      | c.14      | LF diets only; start age 6-8 weeks - using midpoint 49 days                                                         |               |
| 61  | M10 | C57BL/6  | M | 49  | 8  | 151      | 8.6      | 7  | 149      | 6.3      | mg/dL         | Fast Glu | retro orbital plexus | 112 | 5.5 | Yes | 15   | t.17      | c.14      | Fast 5-6 hours; At death                                                                                            |               |
| 62  | M10 | C57BL/6  | M | 49  | 8  | 0.39     | 0.04     | 7  | 0.37     | 0.01     | ng/dL         | Fast Ins | retro orbital plexus | 112 | 5.5 | Yes | 15   | t.17      | c.14      | Fast 5-6 hours; At death                                                                                            |               |
| 180 | M10 | C57BL/6  | M | 49  | 8  | 47.6289  | 3.3677   | 7  | 53.6426  | 4.811    | kJ/24h/mouse  | E intake | by food int.         | 56  |     | No  | 15   | t.17      | c.14      | Average week 4 and 12 - using midpoint of week 8                                                                    |               |
| 63  | R02 | Wistar   | M | 42  | 36 | 435.738  | 5.453    | 36 | 412.248  | 4.614    | g             | BW       | Gravimetric          | 112 |     | No  | 11   | t.18+t.19 | c.15+c.16 | HGI vs LGI; All groups cannulated 4 days prior to respective IVGTTs                                                 |               |
| 64  | R02 | Wistar   | M | 42  | 6  | 364.43   | 14.681   | 36 | 412.248  | 4.614    | g             | BW       | Gravimetric          | 112 |     | No  | 11   | t.20      | c.15+c.16 | GLucose vs LGI                                                                                                      |               |
| 65  | R02 | Wistar   | M | 42  | 5  | 39.3773  | 4.7619   | 5  | 31.8681  | 6.5934   | nM.30min      | Ins AUC  | IVGTT                | 364 | 20  | No  | 11   | t.18      | c.15      | HGI vs LGI; sample size 5-6; Fast overnight but Basal/(Fast Ins) stated 20hours; no anaesthesia mentioned for IVGTT |               |
| 66  | R02 | Wistar   | M | 42  | 6  | 37.6     | 3.2      | 5  | 14.8993  | 3.0873   | nM.30min      | Ins AUC  | IVGTT                | 112 | 20  | No  | 11   | t.19      | c.16      | HGI vs LGI; Fast overnight but Basal/(Fast Ins) stated 20hours; no anaesthesia mentioned for IVGTT                  |               |
| 67  | R02 | Wistar   | M | 42  | 5  | 33.8255  | 2.4161   | 5  | 14.8993  | 3.0873   | nM.30min      | Ins AUC  | IVGTT                | 112 | 20  | No  | 11   | t.20      | c.16      | GLU vs LGI; Fast overnight but Basal/(Fast Ins) stated 20hours; no anaesthesia mentioned for IVGTT                  |               |
| 69  | R02 | Wistar   | M | 42  | 5  | 330.882  | 47.794   | 5  | 73.5294  | 18.3824  | pmol/L        | Fast Ins | Basal IVGTT          | 112 | 20  | No  | 11   | t.20      | c.15+c.16 | GLU vs LGI; no anaesthesia mentioned for IVGTT                                                                      |               |
| 70  | R02 | Wistar   | M | 42  | 5  | 827.206  | 172.794  | 5  | 610.294  | 84.559   | pmol/L        | Fast Ins | Basal IVGTT          | 364 | 20  | No  | 11   | t.18      | c.15      | HGI vs LGI; no anaesthesia mentioned for IVGTT                                                                      |               |
| 71  | M11 | C57BL/6j | M | 112 | 10 | 32.8671  | 0.97905  | 10 | 30       | 0.4895   | g             | BW       | Gravimetric          | 140 |     | No  | 12   | t.21      | c.17      |                                                                                                                     |               |
| 72  | M11 | C57BL/6j | M | 112 | 10 | 6.14054  | 0.69189  | 10 | 3.89189  | 0.17297  | g             | BF       | NMR                  | 112 |     | No  | 12   | t.21      | c.17      |                                                                                                                     |               |
| 73  | M11 | C57BL/6j | M | 112 | 10 | 6350     | 364      | 10 | 3714     | 548      | mM/min        | Glu AUC  | IPGTT                | 105 | 15  | No  | 12   | t.21      | c.17      | Overnight fast stated; no anaesthesia mentioned for IPGTT                                                           |               |
| 74  | M11 | C57BL/6j | M | 112 | 10 | 14382    | 1541     | 10 | 13597    | 1054     | pM/min        | Ins AUC  | IPGTT                | 105 | 15  | No  | 12   | t.21      | c.17      | Overnight fast stated; no anaesthesia mentioned for IPGTT                                                           |               |
| 75  | M11 | C57BL/6j | M | 112 | 10 | 14.3784  | 0.7568   | 10 | 12.2973  | 1.1351   | mmol/L        | Fast Glu | Basal IPGTT          | 105 | 15  | No  | 12   | t.21      | c.17      | Overnight fast stated; no anaesthesia mentioned for IPGTT                                                           |               |
| 76  | M11 | C57BL/6j | M | 112 | 10 | 78.4946  | 12.043   | 10 | 51.828   | 17.2043  | pmol/L        | Fast Ins | Basal IPGTT          | 105 | 15  | No  | 12   | t.21      | c.17      | Overnight fast stated; no anaesthesia mentioned for IPGTT                                                           |               |
| 183 | M11 | C57BL/6j | M | 112 | 10 | 5904.8   | 108.4    | 10 | 5610.1   | 99.4     | kJ/18wk       | E intake | by food int.         | 126 |     | No  | 12   | t.21      | c.17      |                                                                                                                     |               |
| 77  | M07 | C57BL/6j | M | 112 | 8  | 32.3026  | 1.08555  | 8  | 29.9342  | 0.5263   | g             | BW       | Gravimetric          | 140 |     | No  | 12   | t.22      | c.18      | WT only; sample size 8-10 for all                                                                                   |               |
| 78  | M07 | C57BL/6j | M | 308 | 8  | 33.1579  | 0.8553   | 8  | 31.0526  | 0.4934   | g             | BW       | Gravimetric          | 182 |     | No  | 12   | t.23      | c.19      |                                                                                                                     |               |
| 79  | M07 | C57BL/6j | M | 112 | 8  | 6.16471  | 0.65882  | 8  | 3.85882  | 0.18824  | g             | BF       | NMR                  | 112 |     | No  | 12   | t.22      | c.18      |                                                                                                                     |               |
| 80  | M07 | C57BL/6j | M | 308 | 8  | 6.58824  | 0.8      | 8  | 4.51765  | 0.75294  | g             | BF       | NMR                  | 168 |     | No  | 12   | t.23      | c.19      |                                                                                                                     |               |
| 81  | M07 | C57BL/6j | M | 112 | 8  | 6176.47  | 329.41   | 8  | 3952.94  | 494.12   | mM*min        | Glu AUC  | IPGTT                | 105 | 15  | No  | 12   | t.22      | c.18      | Overnight fast stated; no anaesthesia mentioned for IPGTT                                                           |               |
| 82  | M07 | C57BL/6j | M | 308 | 8  | 3435.29  | 188.24   | 8  | 2870.59  | 376.47   | mM*min        | Glu AUC  | IPGTT                | 140 | 15  | No  | 12   | t.23      | c.19      | Overnight fast stated; no anaesthesia mentioned for IPGTT                                                           |               |
| 83  | M07 | C57BL/6j | M | 112 | 8  | 14.02355 | 0.58925  | 8  | 12.2559  | 0.9428   | mmol/L        | Fast Glu | Basal IPGTT          | 105 | 15  | No  | 12   | t.22      | c.18      | Overnight fast stated; no anaesthesia mentioned for IPGTT                                                           |               |
| 84  | M07 | C57BL/6j | M | 308 | 8  | 10.325   | 1.399985 | 8  | 8.691665 | 0.64165  | mmol/L        | Fast Glu | Basal IPGTT          | 140 | 15  | No  | 12   | t.23      | c.19      | Overnight fast stated; no anaesthesia mentioned for IPGTT                                                           |               |
| 186 | M07 | C57BL/6j | M | 112 | 8  | 5882.35  | 117.65   | 8  | 5705.88  | 117.65   | kJ/18 wk      | E intake | NET: by food intake  | 126 |     | No  | 12   | t.24      | c.20      |                                                                                                                     |               |
| 189 | M07 | C57BL/6j | M | 308 | 8  | 7588.24  | 117.64   | 8  | 7000     | 176.47   | kJ/22 wk      | E intake | NET: by food intake  | 154 |     | No  | 12   | t.25      | c.21      |                                                                                                                     |               |
| 85  | M17 | C57BL/6  | M | 49  | 16 | 37.9729  | 1.28135  | 17 | 34.4949  | 0.5797   | g             | BW       | Gravimetric          | 105 |     | No  | 13.4 | t.24      | c.20      | First 16 wks only; start age 6-8 weeks, using midpoint 49 days                                                      |               |
| 86  | M17 | C57BL/6  | M | 49  | 15 | 29.7     | 7        | 17 | 23.2     | 0.6      | %             | BF       | EchoMRI              | 105 |     | No  | 13.4 | t.24      | c.20      |                                                                                                                     |               |
| 87  | M17 | C57BL/6  | M | 49  | 15 | 92       | 5.163978 | 15 | 94       | 3.614784 | mg/dL         | Fast Glu | Basal OGTT           | 98  | 12  | No  | 13.4 | t.24      | c.20      | Sample size 15-17; no anaesthesia mentioned for OGTT                                                                |               |
| 88  | M17 | C57BL/6  | M | 49  | 15 | 6850     | 339.5315 | 15 | 6192     | 529.3077 | min*mg/dL     | Glu AUC  | OGTT                 | 98  | 12  | No  | 13.4 | t.24      | c.20      | Sample size 15-17; no anaesthesia mentioned for OGTT                                                                |               |
| 191 | M17 | C57BL/6  | M | 49  | 15 | 0.612056 | 0.050375 | 16 | 0.707769 | 0.052894 | kcal/g bw/day | E intake | f int.*density       | 105 |     | No  | 13.4 | t.24      | c.20      |                                                                                                                     |               |
| 89  | R03 | SD       | M | 42  | 14 | 376      | 9        | 14 | 355      | 4        | g             | BW       | Gravimetric          | 35  |     | No  | 17.5 | t.25      | c.21      |                                                                                                                     |               |
| 90  | R03 | SD       | M | 42  | 14 | 326      | 18       | 14 | 316      | 8        | g             | BW       | Gravimetric          | 35  |     | No  | 17.5 | t.26      | c.22      | STZ; STZ = neonatal streptozotocin                                                                                  |               |

|     |     |                 |   |    |     |          |          |     |          |          |                  |          |                           |     |     |     |    |                |                |                                                                                                                                                 |
|-----|-----|-----------------|---|----|-----|----------|----------|-----|----------|----------|------------------|----------|---------------------------|-----|-----|-----|----|----------------|----------------|-------------------------------------------------------------------------------------------------------------------------------------------------|
| 91  | R06 | Wistar          | M | 45 | 10  | 336      | 11       | 10  | 327      | 11       | g                | BW       | Gravimetric               | 49  |     | No  | 11 | t.27           | c.23           | Has HF morning meal so daily food 45% of E Carb; surgery to insert cannula 6-7 days prior to clamp; Start age 6-7 weeks, using midpoint 45 days |
| 92  | R06 | Wistar          | M | 45 | 10  | 315      | 30       | 10  | 253      | 32       | mmol/(L.60min)   | Glu AUC  | IVGTT                     | 63  | 15  | No  | 11 | t.27           | c.23           | Switched numbers based on graph; Stated food-deprived; no anaesthesia mentioned for IVGTT                                                       |
| 93  | R06 | Wistar          | M | 45 | 10  | 36610    | 3913.1   | 10  | 25360    | 3478.3   | pmol/(L.30min)   | Ins AUC  | IVGTT                     | 63  | 15  | No  | 11 | t.27           | c.23           | Stated food-deprived; no anaesthesia mentioned for IVGTT                                                                                        |
| 94  | R06 | Wistar          | M | 45 | 7   | 5.26     | 0.06     | 7   | 5.31     | 0.07     | mmol/L           | Fast Glu | clamp                     | 49  | 15  | No  | 11 | t.27           | c.23           | Stated food-deprived; no anaesthesia mentioned for clamp                                                                                        |
| 95  | R06 | Wistar          | M | 45 | 7   | 232      | 32       | 7   | 210      | 14       | pmol/L           | Fast Ins | clamp                     | 49  | 15  | No  | 11 | t.27           | c.23           | Stated food-deprived; no anaesthesia mentioned for clamp                                                                                        |
| 96  | M02 | C57BL/6J        | M | 77 | 10  | 31.79    | 0.83     | 10  | 30.21    | 0.49     | g                | BW       | Gravimetric               | 63  |     | No  | 11 | t.28           | c.24           |                                                                                                                                                 |
| 97  | M02 | C57BL/6J        | M | 77 | 10  | 8.13     | 0.81     | 10  | 4.21     | 0.67     | g                | BF       | tritiated water injection | 63  |     | No  | 11 | t.28           | c.24           |                                                                                                                                                 |
| 99  | R07 | SD              | M | 42 | 11  | 547.9    | 13.4     | 10  | 549.2    | 15.2     | g                | BW       | Gravimetric               | 119 |     | No  | 11 | t.29           | c.25           | Rats partially pancreatectomised 2 wks prior to start (wk -2: 8 wk age)                                                                         |
| 100 | R07 | SD              | M | 42 | 11  | 97.8     | 13.6     | 10  | 57.3     | 7.2      | g                | BF       | tritiated water injection | 119 |     | No  | 11 | t.29           | c.25           |                                                                                                                                                 |
| 102 | R07 | SD              | M | 42 | 11  | 65.4     | 37       | 10  | -85.8    | 24.4     | mM 120 min       | Glu AUC  | OGTT                      | 98  | 16  | No  | 11 | t.29           | c.25           | versus day 0; no anaesthesia mentioned for OGTT                                                                                                 |
| 103 | R07 | SD              | M | 42 | 11  | 592      | 50.4     | 10  | 261.4    | 39.8     | pM 120 min       | Ins AUC  | OGTT                      | 98  | 16  | No  | 11 | t.29           | c.25           | versus day 0; no anaesthesia mentioned for OGTT                                                                                                 |
| 104 | R07 | SD              | M | 42 | 11  | 4.83871  | 0.19355  | 10  | 4.51613  | 0.12903  | mmol/L           | Fast Glu | Basal OGTT                | 98  | 16  | No  | 11 | t.29           | c.25           | no anaesthesia mentioned for OGTT                                                                                                               |
| 105 | R07 | SD              | M | 42 | 11  | 5.45161  | 1        | 10  | 2.935485 | 1        | pmol/L           | Fast Ins | Basal OGTT                | 98  | 16  | No  | 11 | t.29           | c.25           | no anaesthesia mentioned for OGTT                                                                                                               |
| 106 | R07 | SD              | M | 42 | 3.5 | 468.7    | 14.9     | 3.5 | 458.5    | 17.5     | g                | BW       | Gravimetric               | 49  |     | No  | 11 | t.30           | c.26           | Partially pancreatectomised at wk -2. Switched to opposite diet after 7 wks                                                                     |
| 107 | R07 | SD              | M | 42 | 3.5 | 515.7    | 20.6     | 3.5 | 500.6    | 18.9     | g                | BW       | Gravimetric               | 70  |     | No  | 11 | c.26           | t.30           |                                                                                                                                                 |
| 108 | R07 | SD              | M | 42 | 7   | 239.9    | 47.1     | 7   | -85.9    | 51.1     | mM 120 min       | Glu AUC  | OGTT                      | 70  | 16  | No  | 11 | c.26 vs t.30   | t.30 vs c.26   | versus day 49; no anaesthesia mentioned for OGTT                                                                                                |
| 109 | R07 | SD              | M | 42 | 7   | 522      | 58.2     | 7   | -38.5    | 58.6     | pM 120 min       | Ins AUC  | OGTT                      | 70  | 16  | No  | 11 | c.26 vs t.30   | t.30 vs c.26   | versus day 49; no anaesthesia mentioned for OGTT                                                                                                |
| 110 | M05 | 129SvPas        | M | 35 | 5   | 35.2     | 3.264659 | 5   | 33.1     | 0.626099 | g                | BW       | Gravimetric               | 266 |     | No  | 13 | t.31           | c.27           | Sample size 5-8                                                                                                                                 |
| 111 | M05 | 129SvPas        | M | 35 | 5   | 30.1     | 3.398823 | 5   | 21.5     | 1.386362 | %                | BF       | DEXA                      | 266 |     | No  | 13 | t.31           | c.27           | Sample size 5-8                                                                                                                                 |
| 112 | M05 | 129SvPas        | M | 35 | 4   | 6.2      | 0.25     | 4   | 5.4      | 0.45     | mmol/L           | Fast Glu | Basal OGTT                | 245 | 5.5 | No  | 13 | t.31           | c.27           | Sample size 4-8; Fast 5-6 hours; no anaesthesia mentioned for OGTT                                                                              |
| 113 | M05 | 129SvPas        | M | 35 | 4   | 114.5    | 34       | 4   | 58.8     | 11.35    | pmol/L           | Fast Ins | Basal OGTT                | 245 | 5.5 | No  | 13 | t.31           | c.27           | Sample size 4-8; Fast 5-6 hours; no anaesthesia mentioned for OGTT                                                                              |
| 114 | M05 | 129SvPas        | M | 35 | 4   | 2061.22  | 183.675  | 4   | 1897.96  | 122.45   | total AUC        | Glu AUC  | OGTT                      | 245 | 5.5 | No  | 13 | t.31           | c.27           | Sample size 4-8; Fast 5-6 hours; no anaesthesia mentioned for OGTT                                                                              |
| 115 | M05 | 129SvPas        | M | 35 | 4   | 108      | 24       | 4   | 48       | 5.5      | total AUC        | Ins AUC  | OGTT                      | 245 | 5.5 | No  | 13 | t.31           | c.27           | Sample size 4-8; Fast 5-6 hours; no anaesthesia mentioned for OGTT                                                                              |
| 205 | M05 | 129SvPas        | M | 35 | 7   | 20.3279  | 1.239232 | 7   | 20.3279  | 1.610998 | kcal/48hr        | E intake | NET: by food intake       | 266 |     | No  | 13 | t.31           | c.27           | Sample size 6-8                                                                                                                                 |
| 116 | M03 | 129S2/SvPas     | M | 35 | 7   | 32.2449  | 0.925635 | 7   | 30.7483  | 0.925635 | g                | BW       | Gravimetric               | 168 |     | No  | 13 | t.32           | c.28           | Sample size 7-9                                                                                                                                 |
| 117 | M03 | 129S2/SvPas     | M | 35 | 6   | 12.2     | 1.18392  | 6   | 6.1      | 1.714643 | %                | BF       | DXA                       | 126 |     | No  | 13 | t.32           | c.28           | Sample size 6-9                                                                                                                                 |
| 118 | M03 | 129S2/SvPas     | M | 35 | 3.5 | 98.41    | 3.76377  | 3.5 | 94.8954  | 4.870677 | mg/dL            | Fast Glu | tail vein                 | 105 | 15  | No  | 13 | t.32           | c.28           | Sample size 7-8; no anaesthesia mentioned                                                                                                       |
| 119 | M03 | 129S2/SvPas     | M | 35 | 3.5 | 59.749   | 1.549806 | 3.5 | 62.6778  | 1.771217 | mg/dL            | Fast Glu | tail vein                 | 105 | 6   | No  | 13 | t.32           | c.28           | Sample size 7-8; no anaesthesia mentioned                                                                                                       |
| 120 | M03 | 129S2/SvPas     | M | 35 | 7   | 0.513889 | 0.062994 | 7   | 0.263889 | 0.026247 | ng/mL            | Fast Ins | tail vein                 | 105 | 6   | No  | 13 | t.32           | c.28           | Sample size 7-8; no anaesthesia mentioned                                                                                                       |
| 206 | M03 | 129S2/SvPas     | M | 35 | 7   | 80.198   | 1.400213 | 7   | 84.1584  | 1.575257 | kcal/wk          | E intake | by food int.              | 168 |     | No  | 13 | t.32           | c.28           | Sample size 7-9                                                                                                                                 |
| 121 | M04 | C57BL/6         | M | 21 | 20  | 106.23   | 48.89    | 16  | 75.25    | 44.33    | pmol/L           | Fast Ins | necropsy                  | 56  | 16  | Yes | 11 | t.33           | c.29           | Cardiac puncture following 1H NMR(which used anaesthesia)                                                                                       |
| 122 | M04 | C57BL/6         | M | 21 | 20  | 16.89    | 5.79     | 16  | 17.4     | 4.8      | mmol/L           | Fast Glu | necropsy                  | 56  | 16  | Yes | 11 | t.33           | c.29           | Cardiac puncture following 1H NMR(which used anaesthesia)                                                                                       |
| 123 | M04 | C57BL/6         | M | 21 | 20  | 25.88865 | 1.48105  | 16  | 15.8769  | 2.48805  | %                | BF       | 1H MRS                    | 56  |     | No  | 11 | t.33           | c.29           |                                                                                                                                                 |
| 124 | M04 | C57BL/6         | M | 21 | 20  | 29.3368  | 0.4421   | 16  | 28.6737  | 0.6632   | g                | BW       | Gravimetric               | 56  |     | No  | 11 | t.33           | c.29           |                                                                                                                                                 |
| 214 | M04 | C57BL/6         | M | 21 | 20  | 345.61   | 5.122    | 16  | 298.4145 | 4.0245   | kJ/mouse/wk      | E intake | by food int.              | 56  |     | No  | 11 | t.33           | c.29           |                                                                                                                                                 |
| 128 | M08 | C57BL/6J OlaHsd | M | 63 | 50  | 32.98    | 0.5      | 50  | 31.2     | 0.4      | g                | BW       | Gravimetric               | 91  |     | No  | 30 | t.35+t.36+t.37 | c.31+c.32+c.33 |                                                                                                                                                 |
| 129 | M08 | C57BL/6J OlaHsd | M | 63 | 40  | 685.714  | 44.721   | 40  | 496.894  | 39.752   | pg/mL            | Fast Ins | necropsy                  | 91  | 2   | Yes | 30 | t.35+t.36+t.37 | c.31+c.32+c.33 |                                                                                                                                                 |
| 130 | M08 | C57BL/6J OlaHsd | M | 63 | 40  | 9.375    | 0.1875   | 40  | 9        | 0.28125  | mM               | Fast Glu | necropsy                  | 91  | 2   | Yes | 30 | t.35+t.36+t.37 | c.31+c.32+c.33 |                                                                                                                                                 |
| 134 | M08 | C57BL/6J OlaHsd | M | 63 | 7   | 701.22   | 24.39    | 7   | 548.78   | 18.2925  | glucose*time; au | Glu AUC  | IPGTT                     | 77  | 5   | No  | 30 | t.37           | c.33           | Sample size 7-10; no anaesthesia mentioned for IPGTT                                                                                            |
| 215 | M08 | C57BL/6J OlaHsd | M | 63 | 50  | 1350     | 20       | 50  | 1355     | 20       | kcal/13 wk       | E intake | by food int.              | 91  |     | No  | 30 | t.37           | c.33           |                                                                                                                                                 |
| 136 | M01 | CBA/T6          | M | 42 | 12  | 31.1     | 0.6      | 12  | 29       | 0.4      | g                | BW       | Gravimetric               | 70  |     | No  | 11 | t.39           | c.35           | WT; GTG = IP injection of gold thioglucose at Week 2                                                                                            |
| 137 | M01 | CBA/T6          | M | 42 | 12  | 38.1     | 0.6      | 11  | 35.6     | 0.8      | g                | BW       | Gravimetric               | 70  |     | No  | 11 | t.40           | t.36           | GTG                                                                                                                                             |

|     |     |          |   |     |    |          |         |    |         |         |              |          |              |     |     |     |      |           |           |                                                                                                                                                                                                            |
|-----|-----|----------|---|-----|----|----------|---------|----|---------|---------|--------------|----------|--------------|-----|-----|-----|------|-----------|-----------|------------------------------------------------------------------------------------------------------------------------------------------------------------------------------------------------------------|
| 138 | M01 | CBA/T6   | M | 42  | 12 | 1.93     | 0.29    | 12 | 2.82    | 0.37    | ng/mL        | Fast Ins | necropsy     | 70  | 2.5 | Yes | 11   | t.39      | c.35      | WT; Fast 2-3 hours                                                                                                                                                                                         |
| 139 | M01 | CBA/T6   | M | 42  | 12 | 3.83     | 0.61    | 11 | 5.34    | 0.55    | ng/mL        | Fast Ins | necropsy     | 70  | 2.5 | Yes | 11   | t.40      | c.36      | GTG; Fast 2-3 hours                                                                                                                                                                                        |
| 140 | M01 | CBA/T6   | M | 42  | 12 | 13.6     | 0.7     | 12 | 12.2    | 0.6     | mM           | Fast Glu | necropsy     | 70  | 2.5 | Yes | 11   | t.39      | c.35      | WT; Fast 2-3 hours                                                                                                                                                                                         |
| 141 | M01 | CBA/T6   | M | 42  | 12 | 18       | 1.4     | 11 | 14.3    | 0.5     | mM           | Fast Glu | necropsy     | 70  | 2.5 | Yes | 11   | t.40      | c.36      | GTG; Fast 2-3 hours                                                                                                                                                                                        |
| 142 | R05 | Wistar   | M | 42  | 23 | 340      | 4       | 26 | 305     | 3       | g            | BW       | Gravimetric  | 42  |     | No  | 11   | t.41+t.42 | c.37+c.38 |                                                                                                                                                                                                            |
| 143 | R05 | Wistar   | M | 42  | 8  | 5.4      | 0.3     | 8  | 5.7     | 0.3     | mmol/L       | Fast Glu | Basal IVGTT  | 42  | 15  | No  | 11   | t.41      | c.37      | Control; Lep rats given bolus recombinant mouse leptin followed by continuous infusion for 1 hr. Control rats received vehicle only; rats had cannula surgery 3-4 days prior IVGTT                         |
| 144 | R05 | Wistar   | M | 42  | 5  | 5.9      | 0.2     | 6  | 5.7     | 0.1     | mmol/L       | Fast Glu | Basal IVGTT  | 42  | 15  | No  | 11   | t.42      | c.38      | Lep; overnight fast; no anaesthesia mentioned for IVGTT                                                                                                                                                    |
| 145 | R05 | Wistar   | M | 42  | 8  | 2        | 0.2     | 8  | 1.6     | 0.3     | ng/mL        | Fast Ins | Basal IVGTT  | 42  | 15  | No  | 11   | t.41      | c.37      | Control; overnight fast; no anaesthesia mentioned for IVGTT                                                                                                                                                |
| 146 | R05 | Wistar   | M | 42  | 5  | 1.7      | 0.3     | 6  | 0.9     | 0.2     | ng/mL        | Fast Ins | Basal IVGTT  | 42  | 15  | No  | 11   | t.42      | c.38      | Lep; overnight fast; no anaesthesia mentioned for IVGTT                                                                                                                                                    |
| 147 | R05 | Wistar   | M | 42  | 8  | 590      | 26      | 8  | 587     | 20      | mM x h       | Glu AUC  | IVGTT        | 42  | 15  | No  | 11   | t.41      | c.37      | Control; overnight fast; no anaesthesia mentioned for IVGTT                                                                                                                                                |
| 148 | R05 | Wistar   | M | 42  | 5  | 633      | 12      | 6  | 653     | 11      | mM x h       | Glu AUC  | IVGTT        | 42  | 15  | No  | 11   | t.42      | c.38      | Lep; overnight fast; no anaesthesia mentioned for IVGTT                                                                                                                                                    |
| 149 | R05 | Wistar   | M | 42  | 8  | 707      | 163     | 8  | 200     | 30      | ng/mL x h    | Ins AUC  | IVGTT        | 42  | 15  | No  | 11   | t.41      | c.37      | Control; overnight fast; no anaesthesia mentioned for IVGTT                                                                                                                                                |
| 150 | R05 | Wistar   | M | 42  | 5  | 298      | 48      | 6  | 214     | 26      | ng/mL x h    | Ins AUC  | IVGTT        | 42  | 15  | No  | 11   | t.42      | c.38      | Lep; overnight fast; no anaesthesia mentioned for IVGTT                                                                                                                                                    |
| 151 | M06 | C57BL/6J | M | 126 | 8  | 156.0605 | 7.5755  | 8  | 190.909 | 18.182  | mg/dL        | Fast Glu | Basal OGTT   | 19  | 5   | No  | 16.7 | t.43      | c.39      | Ctrl HGI vs STZ LGI; STZ = streptozotocin injection once daily for Days 11-15. Control mice received a citrate buffer injection; Assume Adult = 18 wks; Sample size 8-9; no anaesthesia mentioned for OGTT |
| 152 | M06 | C57BL/6J | M | 126 | 8  | 251.515  | 24.2425 | 8  | 190.909 | 18.182  | mg/dL        | Fast Glu | Basal OGTT   | 19  | 5   | No  | 16.7 | t.44      | c.39      | STZ HGI vs STZ LGI; Sample size 8-9; no anaesthesia mentioned for OGTT                                                                                                                                     |
| 153 | M06 | C57BL/6J | M | 126 | 8  | 17.0504  | 0.8633  | 8  | 20.9353 | 1.5107  | g/dL*180min  | Glu AUC  | OGTT         | 19  | 5   | No  | 16.7 | t.43      | c.39      | Ctrl HGI vs STZ LGI; Sample size 8-9; no anaesthesia mentioned for OGTT                                                                                                                                    |
| 154 | M06 | C57BL/6J | M | 126 | 8  | 26.7626  | 1.7266  | 8  | 20.9353 | 1.5107  | g/dL*180min  | Glu AUC  | OGTT         | 19  | 5   | No  | 16.7 | t.44      | c.39      | STZ HGI vs STZ LGI; Sample size 8-9; no anaesthesia mentioned for OGTT                                                                                                                                     |
| 155 | R09 | SD       | M | 126 | 50 | 4.39     | 0.1     | 50 | 3.55    | 0.11    | g            | BF       | necropsy     | 10  |     | No  | 16.7 | t.45      | c.40      | Can't tell of F1 is fed or fasted Glu/Ins; Assume Adult = 18 wks                                                                                                                                           |
| 216 | R09 | SD       | M | 126 | 50 | 133.65   | 1.65    | 50 | 130.35  | 2.97    | kcal/48 hour | E intake | by food int. | 9   |     | No  | 16.7 | t.45      | c.40      |                                                                                                                                                                                                            |
| 157 | R04 | SD       | F |     | 14 | 275      | 3       | 16 | 262     | 6       | g            | BW       | Gravimetric  | 14  |     | No  | 11   | t.46      | c.41      | Sham result; glucose = HGI, vs fructose = LGI; Start age not stated                                                                                                                                        |
| 158 | R04 | SD       | F |     | 14 | 342      | 6       | 12 | 330     | 14      | g            | BW       | Gravimetric  | 14  |     | No  | 11   | t.47      | c.42      | VMH results                                                                                                                                                                                                |
| 159 | R04 | SD       | F |     | 14 | 1.5      | 0.3     | 16 | 2.1     | 0.3     | ng/mL        | Fast Ins |              | 14  | 5   | Yes | 11   | t.46      | c.41      | Sham result; no anaesthesia mentioned for IVGTT but is mentioned for clamp                                                                                                                                 |
| 160 | R04 | SD       | F |     | 14 | 3.2      | 0.5     | 12 | 3.5     | 0.3     | ng/mL        | Fast Ins |              | 14  | 5   | Yes | 11   | t.47      | c.42      | VMH results; no anaesthesia mentioned for IVGTT but is mentioned for clamp                                                                                                                                 |
| 161 | R04 | SD       | F |     | 14 | 6.9      | 0.4     | 16 | 7.3     | 0.4     | mmol/L       | Fast Glu |              | 14  | 5   | Yes | 11   | t.46      | c.41      | Sham result; no anaesthesia mentioned for IVGTT but is mentioned for clamp                                                                                                                                 |
| 162 | R04 | SD       | F |     | 14 | 4.3      | 0.3     | 12 | 6.6     | 0.5     | mmol/L       | Fast Glu |              | 14  | 5   | Yes | 11   | t.47      | c.42      | VMH results; no anaesthesia mentioned for IVGTT but is mentioned for clamp                                                                                                                                 |
| 163 | R04 | SD       | F |     | 6  | 353.623  | 104.348 | 6  | 823.188 | 168.116 | ng/mL*min    | Ins AUC  | IVGTT        | 14  | 5   | No  | 11   | t.46      | c.41      | Sham result; no anaesthesia mentioned for IVGTT                                                                                                                                                            |
| 164 | R04 | SD       | F |     | 5  | 405.797  | 63.768  | 5  | 736.232 | 226.087 | ng/mL*min    | Ins AUC  | IVGTT        | 14  | 5   | No  | 11   | t.47      | c.42      | VMH results; no anaesthesia mentioned for IVGTT                                                                                                                                                            |
| 165 | M16 | C57Bl/6J | M | 77  | 9  | 1921.82  | 97.72   | 10 | 1425.08 | 73.29   | mM.min       | Glu AUC  | IPGTT        | 231 | 6   | No  | 14   | t.48      | c.43      | WT only; no anaesthesia mentioned for IPGTT; units not stated; assuming IPGTT occurred at end                                                                                                              |
| 166 | M16 | C57Bl/6J | M | 77  | 9  | 11.3055  | 0.4244  | 10 | 8.8746  | 0.34726 | mmol/L       | Fast Glu | Average of 4 | 231 | 6   | No  | 14   | t.48      | c.43      | ASSUMPTIONS based on limited data                                                                                                                                                                          |
| 167 | M16 | C57Bl/6J | M | 77  | 9  | 30.0645  | 2.4516  | 10 | 28.3871 | 1.6774  | g            | BW       | Gravimetric  | 231 |     | No  | 14   | t.48      | c.43      |                                                                                                                                                                                                            |

Article number refers to list in Tables 4/6 and 5/7 for mice and rats respectively. Articles M12 (Van Schothorst *et al.* 2011), M13 (Uchiki *et al.* 2012), M14 (Weikel *et al.* 2012), M15 (Birarda *et al.* 2013), R08 (Kopilas *et al.* 2007), R13 (Stavrovskaya *et al.* 2013) and R15 (Thompson *et al.* 2016) did not contain any relevant results. Test/Ctrl ID refers to the cohort used. Data ID is unique.

Text S1: R code for meta-analysis.

```
rm(list=ls())
detach(data)

# install.packages("metafor")

library(metafor)

setwd("X:")

data<-read.csv("HGIdata1.csv")

# Changing SEM to SD for S pooled calculation
data$Ctrl.SD<-data$Ctrl.SEM*sqrt(data$Ctrl.n)
data$Test.SD<-data$Test.SEM*sqrt(data$Test.n)

#Scaling continuous variables to units of SD instead of unit (day/hour/%)
data$Start.Age..day.<-scale(data$Start.Age..day.)
data$TimePt..days.<-scale(data$TimePt..days.)
data$Fast.time..hrs.<-scale(data$Fast.time..hrs.)
data$Fat...E.<-scale(data$Fat...E.)

# Step 1: Calculate effect sizes
J<-1-(3/(4*(data$Ctrl.n+data$Test.n-2)-1))
spooled<-sqrt((((data$Ctrl.n-1)*(data$Ctrl.SD)^2+(data$Test.n-1)*(data$Test.SD)^2)/(data$Ctrl.n+data$Test.n-2))
data$d<-(data$Test.Meas-data$Ctrl.Meas)/spooled*J
data$variance<-(data$Ctrl.n+data$Test.n)/(data$Ctrl.n*data$Test.n)+(data$d^2/(2*(data$Test.n+data$Ctrl.n)))

Calc.cov.d<-function(CN, d_i, d_j, Total.N){
  Cov<-(1 / CN) + ((d_i * d_j) / (2 * Total.N))
  return(Cov)
}

#create vector of all 6 unique traits to loop through for each
treatments<-unique(data$Trait)

panels<-c("a","a","c","b","c","b","d")
```

```

title<-c("Body Weight","Fasting Glucose","Glucose AUC","Body Fat","Energy Intake","Fasting Insulin","Insulin AUC")
pdf("Figures 2 and 3.pdf", 11.69, 8.27)
par(mfrow=c(3,5), mar=c(5,1,3,1))
plot(-10, -10, ylim=c(0,11), xlim=c(-2,2),xlab="",ylab="",axes=F)

#pdf("Figure S1.pdf", 8.27, 11.69)
#par(mfrow=c(4,2), mar=c(5,5,3,1))

#loop
for(i in 1:length(treatments)){
  # get the appropriate subset of the data
  subset<-treatments[i]

  # Step 2: subset dataset example data.BW<-data[which(data$Trait == "BW"),]
  data.subset<-data[which(data$Trait == subset),]
  print(dim(data.subset))

  #creating varibale to enable dissection by mouse or rat
  MR<-substr(data.subset$Article, 1, 1)

  # Create matrix for VCV
  VCV.lnRR<-matrix(0,nrow = dim(data.subset)[1],ncol = dim(data.subset)[1])

  # get data IDs
  Data.ID<-data.subset$Data.ID
  rownames(VCV.lnRR) <- Data.ID
  colnames(VCV.lnRR) <- Data.ID

  # Find out those with shared controls
  Shared.Control<-data.subset$Ctrl.ID
  shared_coord <- which(Shared.Control%in%Shared.Control[duplicated(Shared.Control)]==TRUE)

  # If there are shared coords add in the covariance

```

```

if(length(shared_coord) > 0){

# matrix of combinations of coordinates for each experiment with shared control
combinations<-do.call("rbind",tapply(shared_coord, data.subset[shared_coord,"Ctrl.ID"], function(x) t(combn(x,2))))

# Calculate covariance values between d values at the positions in shared_list and place them on the matrix
for (j in 1:dim(combinations)[1]){
  p1 <- combinations[j,1]
  p2 <- combinations[j,2]

  p1_p2_cov <- Calc.cov.d(CN = data.subset[p1,"Ctrl.n"], d_i = data.subset[p1,"d"], d_j = data.subset[p2,"d"], Total.N
= (data.subset[p1,"Ctrl.n"] + data.subset[p1,"Test.n"] + data.subset[p2,"Test.n"]))

  VCV.lnRR[p1,p2] <- p1_p2_cov
  VCV.lnRR[p2,p1] <- p1_p2_cov
}
}

# add in the diagonal as the Variances
diag(VCV.lnRR)<-data.subset$variance

# Using matrix to conduct more complex meta-analyses
Metac<-rma.mv(yi=d,V=VCV.lnRR,random=~Data.ID,data=data.subset)
summary(Metac)
resid<-rstandard(Metac)$resid
modeltf<-rma(yi=resid, vi=data.subset$variance)
trimfill(modeltf)
#funnel(Metac)
#mtext(title[i],side=3,line=1)

Metac.reg1<-rma.mv(yi=d,V=VCV.lnRR,random=~Data.ID,data=data.subset, mods=~TimePt..days.)
summary(Metac.reg1)

Metac.reg2<-rma.mv(yi=d,V=VCV.lnRR,random=~Data.ID,data=data.subset, mods=~Sex-1)
summary(Metac.reg2)

```



```

Metac.reg3<-rma.mv(yi=d,V=VCV.lnRR,random=~Data.ID,data=data.subset, mods=~Start.Age..day.)
summary(Metac.reg3)

#Metac.reg4<-rma.mv(yi=d,V=VCV.lnRR,random=~Data.ID,data=data.subset, mods=~Species)
#summary(Metac.reg4)

Metac.reg7<-rma.mv(yi=d,V=VCV.lnRR,random=~Data.ID,data=data.subset, mods=~MR-1)
summary(Metac.reg7)

Metac.reg8<-rma.mv(yi=d,V=VCV.lnRR,random=~Data.ID,data=data.subset, mods=~Fat....E.)
summary(Metac.reg8)

plot(-10, -10, ylim=c(0,11), xlim=c(-2,2),xlab="Effect Size",ylab="",axes=F)
axis(1)
abline(v=0)

points(Metac$b,11,pch=16)
arrows(Metac$ci.lb,11,Metac$ci.ub,11,code=0)
points(Metac.reg7$b,c(10,9),pch=16)
arrows(Metac.reg7$ci.lb, c(10,9),Metac.reg7$ci.ub,c(10,9), code=0)
points(Metac.reg3$b[2],4,pch=16)
arrows(Metac.reg3$ci.lb[2],4,Metac.reg3$ci.ub[2],4, code=0)
points(Metac.reg2$b,c(8,7),pch=16)
arrows(Metac.reg2$ci.lb, c(8,7),Metac.reg2$ci.ub,c(8,7), code=0)
points(Metac.reg1$b[2],6,pch=16)
arrows(Metac.reg1$ci.lb[2],6,Metac.reg1$ci.ub[2],6, code=0)
points(Metac.reg8$b[2],5,pch=16)
arrows(Metac.reg8$ci.lb[2],5,Metac.reg8$ci.ub[2],5, code=0)

if (i %in% c(2,3,6,7)){
  Metac.reg6<-rma.mv(yi=d,V=VCV.lnRR,random=~Data.ID,data=data.subset, mods=~Fast.time..hrs.)
  summary(Metac.reg6)
}

```

```

points(Metac.reg6$b[2],3,pch=16)
arrows(Metac.reg6$ci.lb[2],3,Metac.reg6$ci.ub[2],3, code=0)
}

if (i %in% c(2,6)){
  Metac.reg5<-rma.mv(yi=d,V=VCV.lnRR,random=~Data.ID,data=data.subset, mods=~Anaes.G.I..Y.N.-1)
  summary(Metac.reg5)
  points(Metac.reg5$b,c(2,1),pch=16)
  arrows(Metac.reg5$ci.lb, c(2,1),Metac.reg5$ci.ub,c(2,1), code=0)
}

mtext(title[i],side=3,line=1)
mtext(panels[i],side=3,line=1,at=-1.5)

if ( i < 3) {
  mtext("All",side=2,at=11,line=1,las=2)
  mtext("Mice",side=2,at=10,line=1,las=2)
  mtext("Rats",side=2,at=9,line=1,las=2)
  mtext("Starting Age",side=2,at=4,line=1,las=2)
  mtext("Female",side=2,at=8,line=1,las=2)
  mtext("Male",side=2,at=7,line=1,las=2)
  mtext("Length of Diet",side=2,at=6,line=1,las=2)
  mtext("Dietary Fat (% E)",side=2,at=5,line=1,las=2)
  mtext("Fasting Time",side=2,at=3,line=1,las=2)
  mtext("No Anaesthesia",side=2,at=2,line=1,las=2)
  mtext("Anaesthesia",side=2,at=1,line=1,las=2)
}
}

dev.off()

```
